# Supplementary material for: An AIE active sulfonyldianiline derived Schiff base for the detection of folic acid, hemoglobin, and glucose
Source: Royal Society of Chemistry journal article supplement (doi:10.1039/d4nj03833a), 2024-12-18
Supplement: d4nj03833a1.pdf [file d4nj03833a1.pdf]

## Supporting Information

### **AIE active sulfonyldianiline derived Schiff base for the detection of folic acid, hemoglobin and glucose**

**Dhvani A. Patel<sup>a</sup>, Bigyan R. Jali<sup>b</sup> and Suban K. Sahoo<sup>a\*</sup>**

<sup>a</sup> *Department of Chemistry, Sardar Vallabhbhai National Institute of Technology, Surat-395007, Gujarat, India.*

<sup>b</sup> *Department of Chemistry, Veer Surendra Sai University of Technology, Burla, Sambalpur-768018, Odisha, India.*

\*Corresponding author (Dr. Sahoo): [sks@chem.svnit.ac.in](mailto:sks@chem.svnit.ac.in).

## Sample Information

|                       |                         |                           |                                                              |
|-----------------------|-------------------------|---------------------------|--------------------------------------------------------------|
| <b>Name</b>           | AS_Barakha_150424_SDASA | <b>Data File Path</b>     | D:\Projects\SEP_2023\Data\Apr_2024\AS_Barakha_150424_SDASA.d |
| <b>Sample ID</b>      |                         | <b>Acq. Time (Local)</b>  | 15-04-2024 15:22:12 (UTC+05:30)                              |
| <b>Instrument</b>     | LCQTOF                  | <b>Method Path (Acq)</b>  | D:\Projects\SEP_2023\Methods\POSITIVE.m                      |
| <b>MS Type</b>        | QTOF                    | <b>Version (Acq SW)</b>   | 6200 series TOF/6500 series Q-TOF (11.0.203.0)               |
| <b>Inj. Vol. (ul)</b> | 2                       | <b>IRM Status</b>         | Success                                                      |
| <b>Position</b>       | P1-B2                   | <b>Method Path (DA)</b>   | D:\Projects\INSTALLATION\Methods\IIT Roorkee.m               |
| <b>Plate Pos.</b>     |                         | <b>Target Source Path</b> |                                                              |
| <b>Operator</b>       | SYSTEM (SYSTEM)         | <b>Result Summary</b>     | 1 qualified (1 targets)                                      |

## Sample Spectra

## + Scan (rt: 0.084 min)

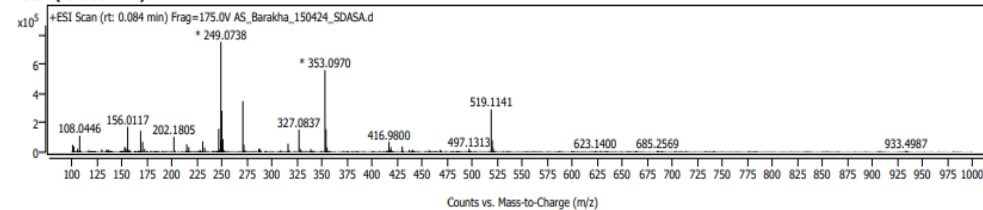

## Compound Details

Cpd. 1: C<sub>26</sub>H<sub>20</sub>N<sub>2</sub>O<sub>4</sub>S

| Formula                                                         | Mass     | Score | Algorithm | Diff (Tgt, ppm)  | Polarity |
|-----------------------------------------------------------------|----------|-------|-----------|------------------|----------|
| C <sub>26</sub> H <sub>20</sub> N <sub>2</sub> O <sub>4</sub> S | 456.1151 | 57.79 | FBF       | 1.64768286951381 | Positive |

## Compound Spectra (overlay)

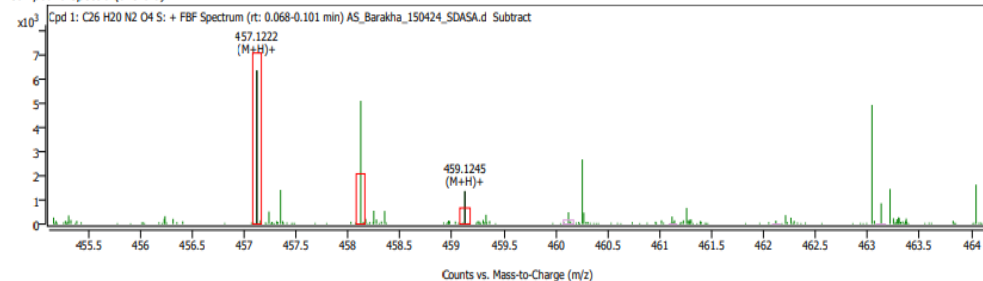

MassHunter Qual 10.0  
(End of Report)

**Fig. S1.** Mass spectrum of SDASA.

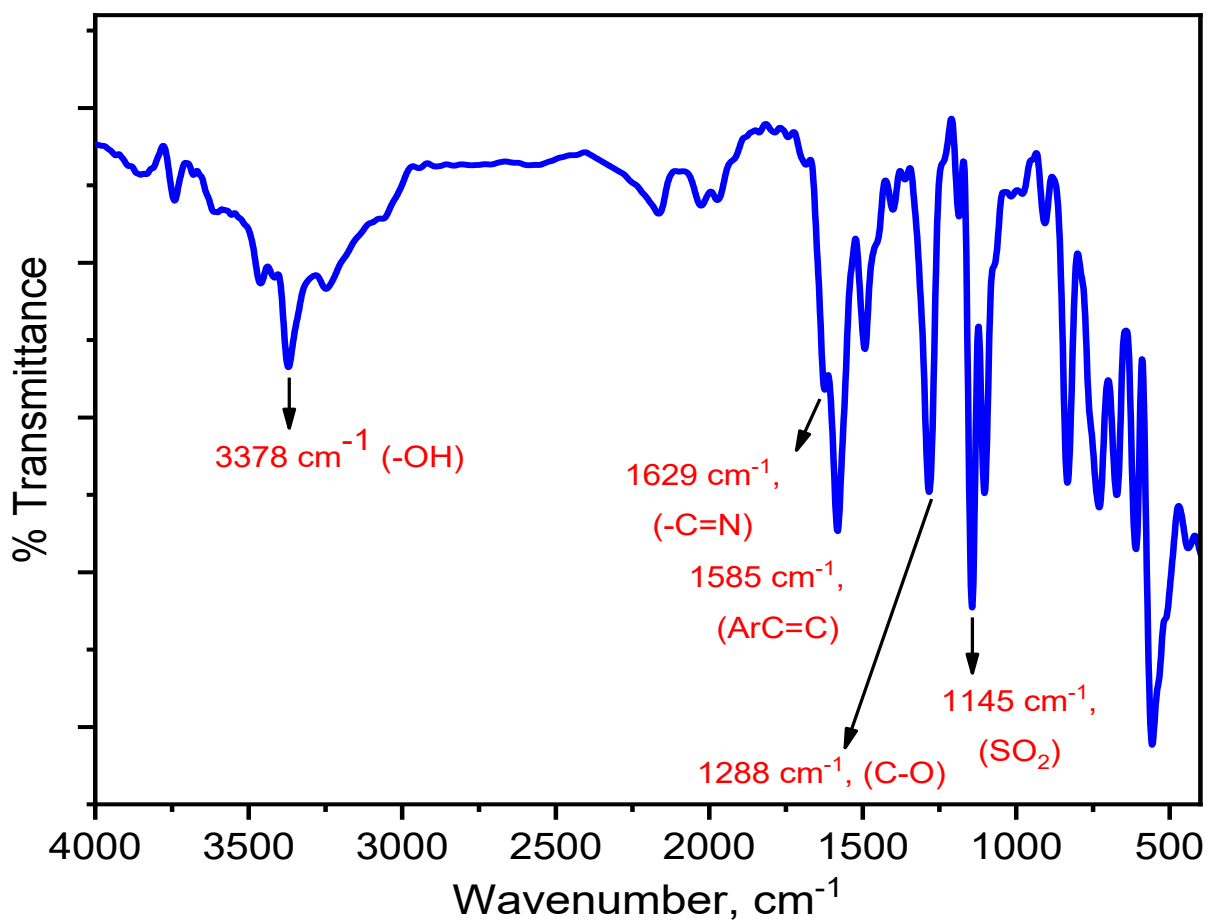

**Fig. S2.** FT-IR spectra of SDASA.

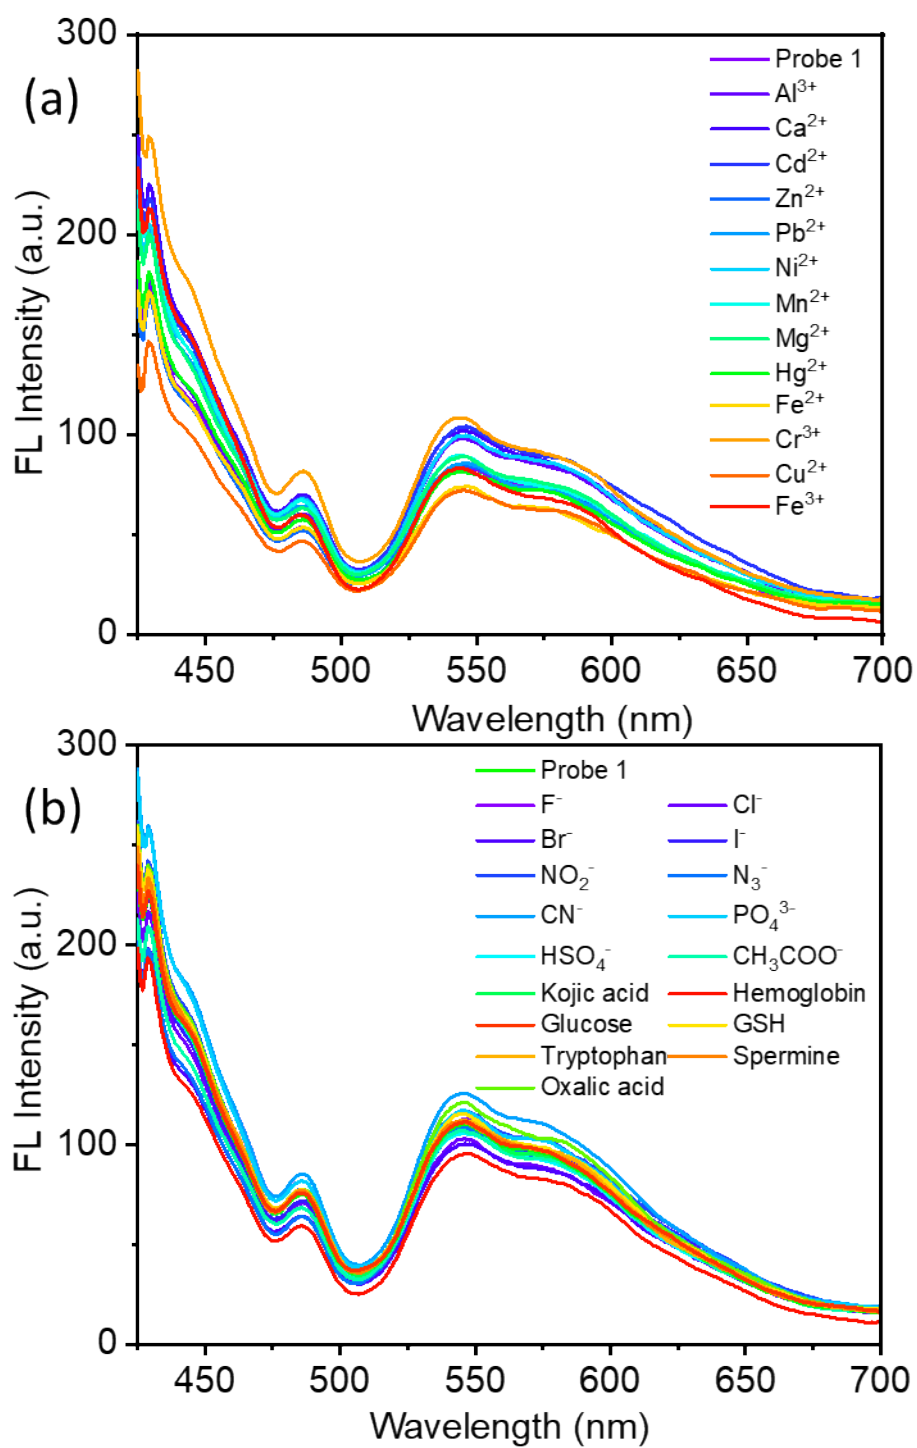

**Fig. S3.** The fluorescence spectral changes of Probe 1 ( $5 \times 10^{-5}$  M) in the absence and presence of different analytes ( $5 \times 10^{-5}$  M).

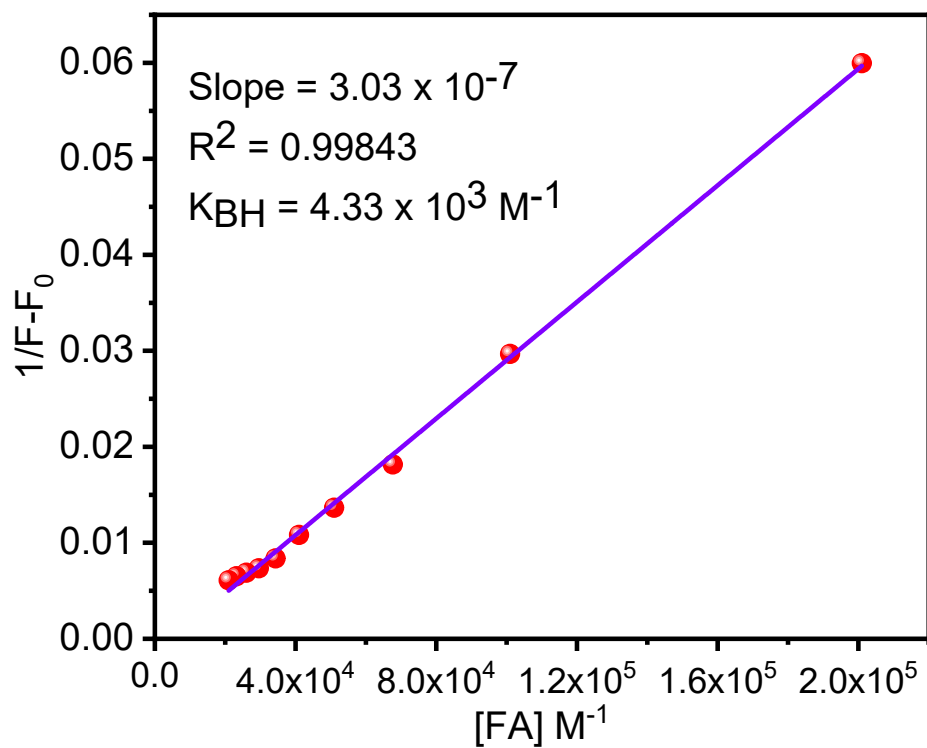

**Fig. S4.** The B-H plot of probe 1 with FA.

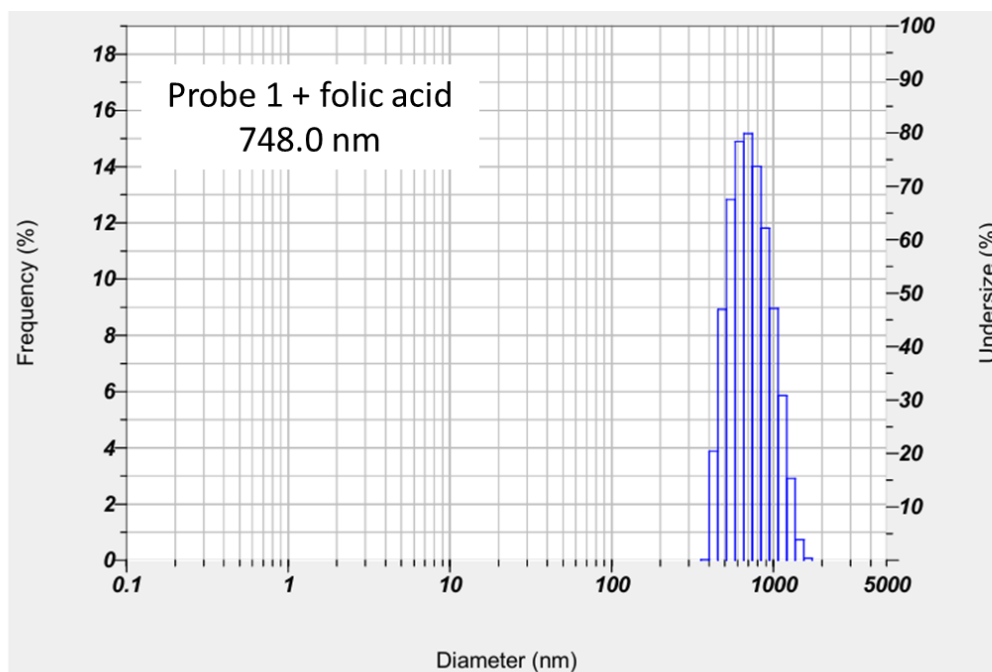

**Fig. S5.** DLS of probe 1 in the presence of FA.

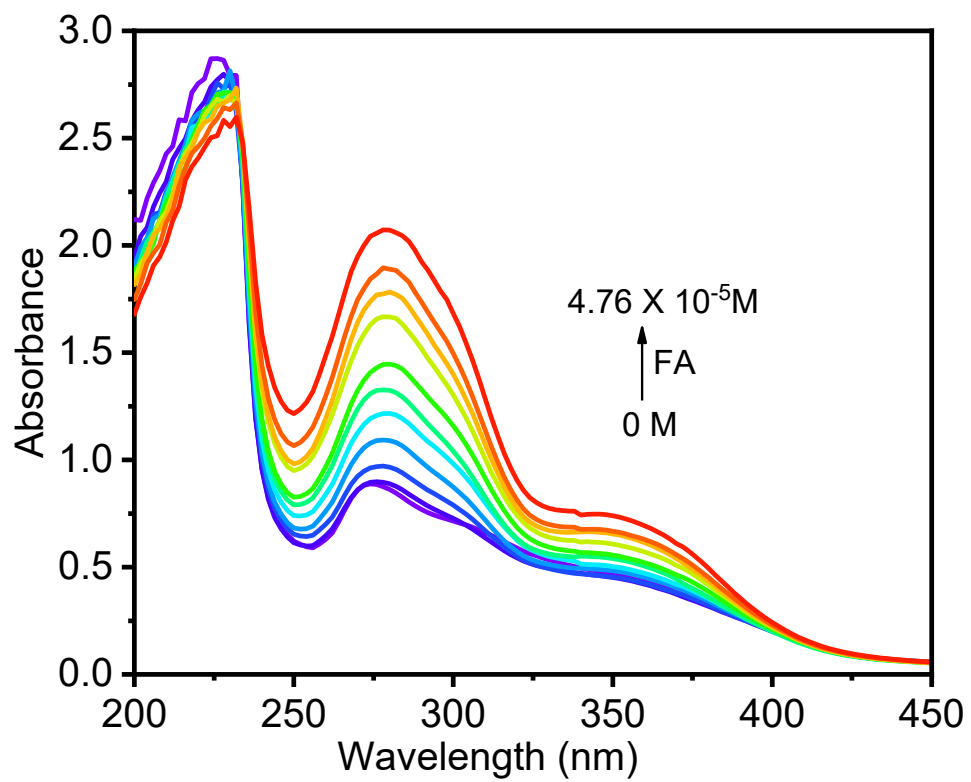

**Fig. S6.** UV-Vis spectral changes of probe 1 upon successive incremental addition of FA.

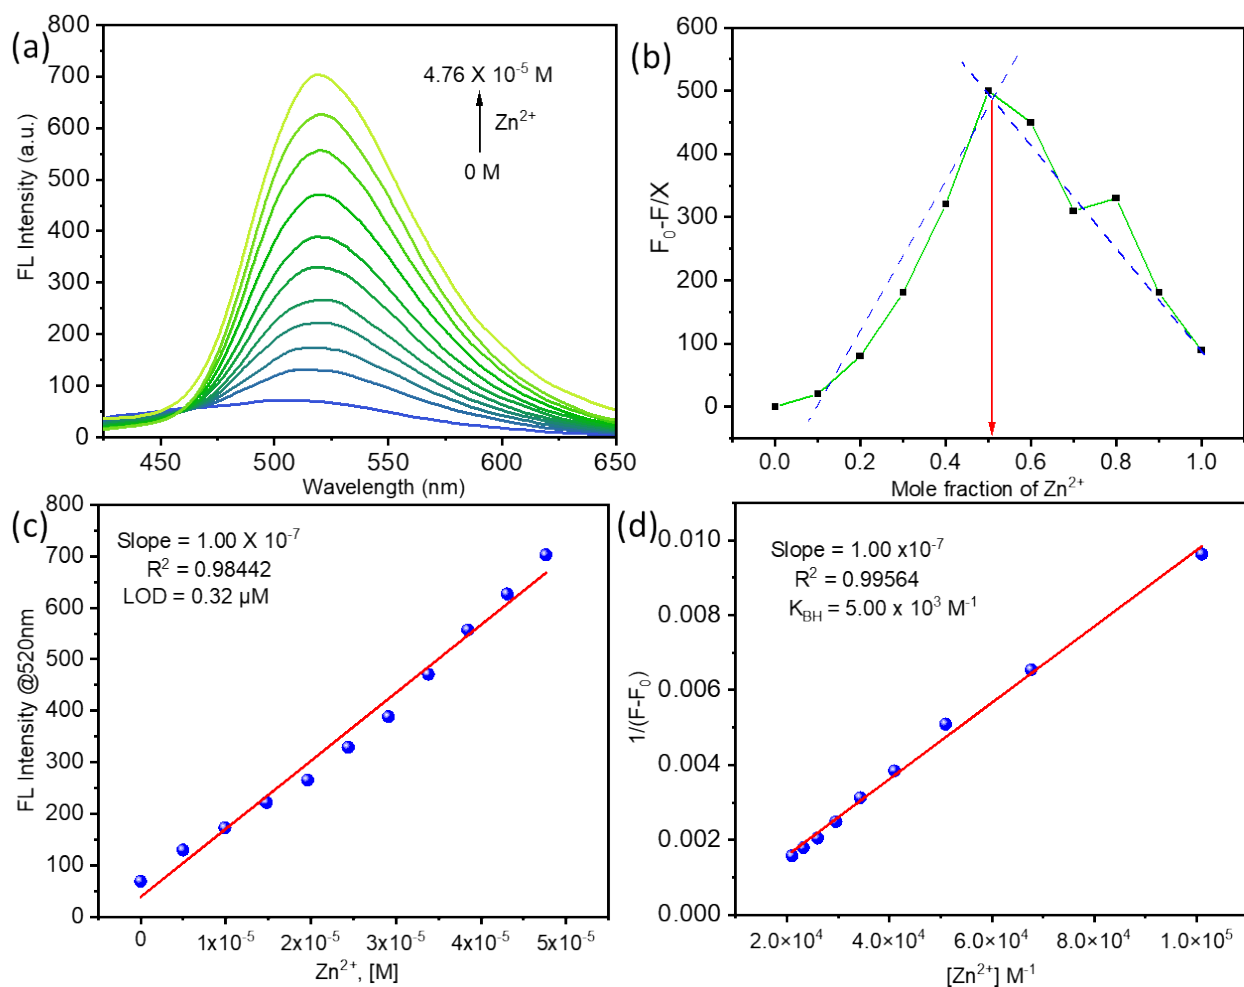

**Fig. S7.** (a) Fluorescence spectral changes of SDASA ( $5 \times 10^{-5}$  M, DMSO) upon successive incremental addition of  $\text{Zn}^{2+}$ . (b) The calibration plot for estimation the LOD for  $\text{Zn}^{2+}$ . (c) The Job's plot of SDASA- $\text{Zn}^{2+}$  complex at 520 nm, plotted against the mole fraction of  $\text{Zn}^{2+}$ . (d) The B-H plot for SDASA- $\text{Zn}^{2+}$  complex.

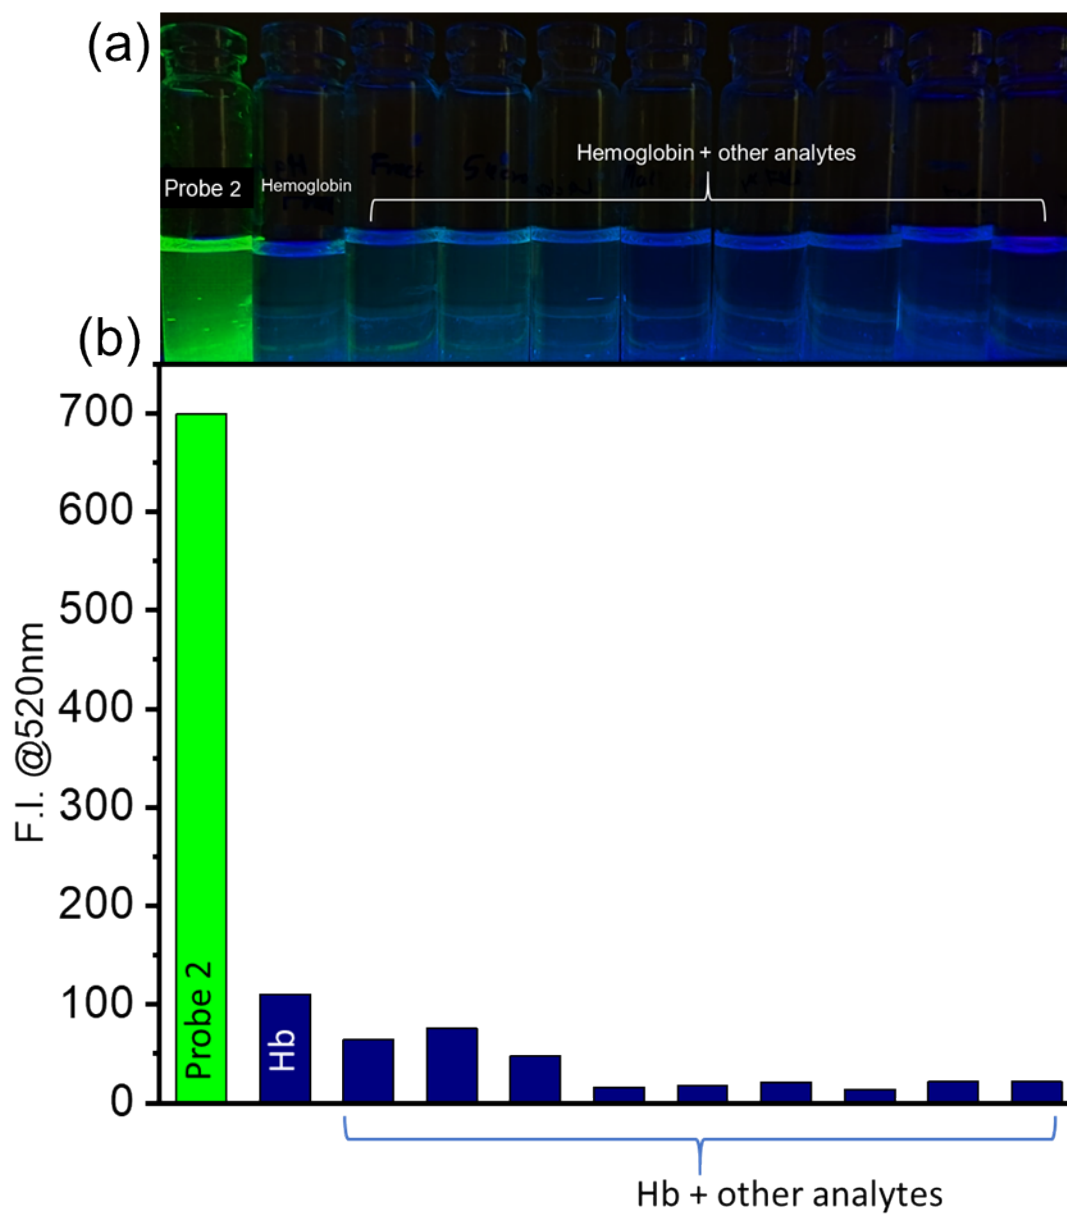

**Fig. S8.** Fluorescence colour (a) and spectral (b) changes of probe 2 ( $5 \times 10^{-5}$  M) in the presence of Hb ( $2.5 \times 10^{-5}$  M) and an equimolar amount of other analytes.



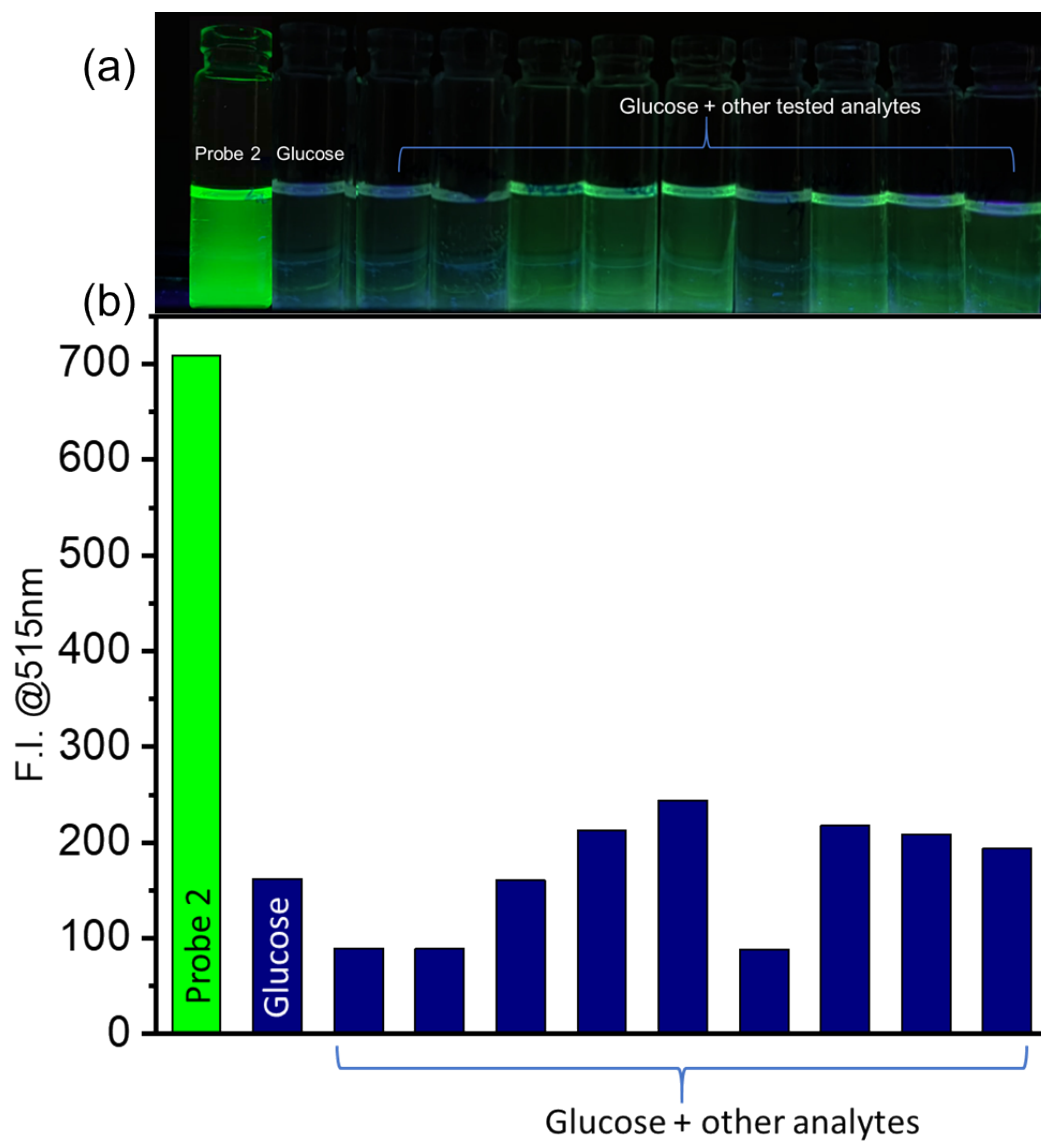

**Fig. S9.** Fluorescence colour (a) and spectral (b) changes of probe 2 ( $5 \times 10^{-5}$  M) in the presence of glucose ( $2.5 \times 10^{-5}$  M) and an equimolar amount of other analytes.

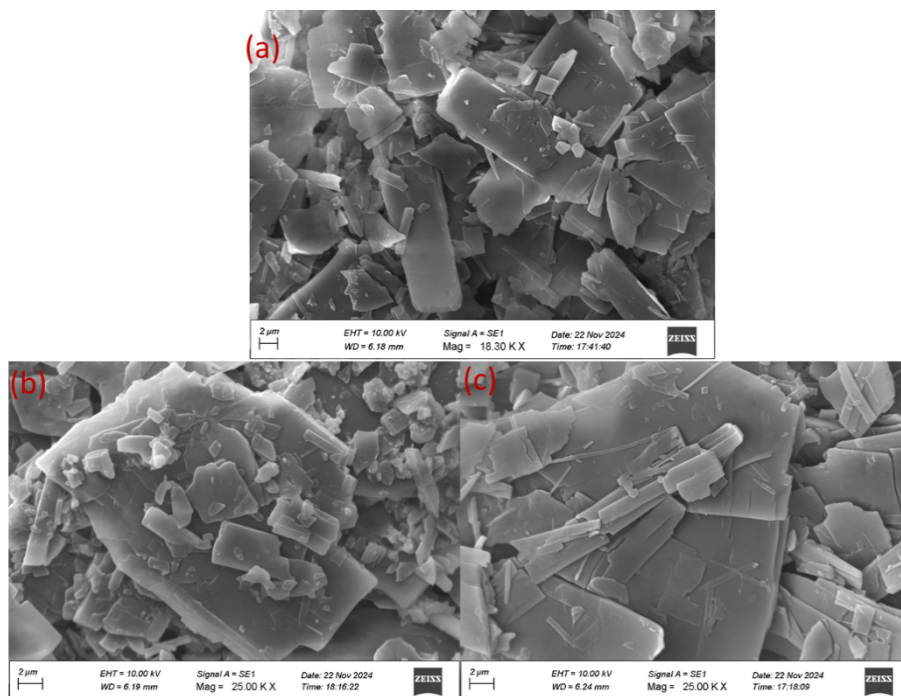

**Fig. S10.** The SEM images of probe 2 in the absence (a) and presence of hemoglobin (b) and glucose (c).

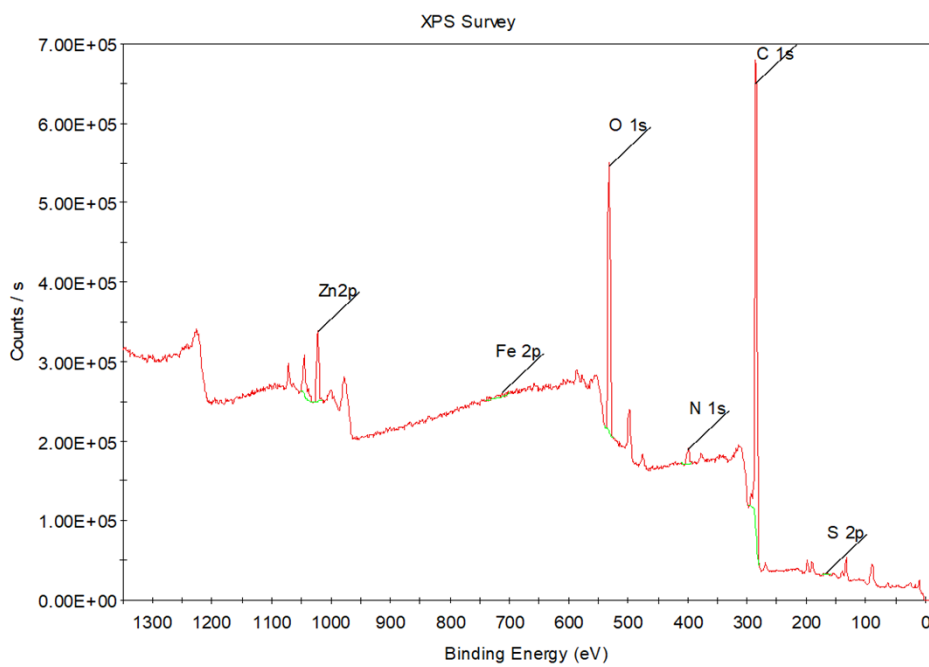

**Fig. S11.** XPS survey scan of probe 2 with hemoglobin.

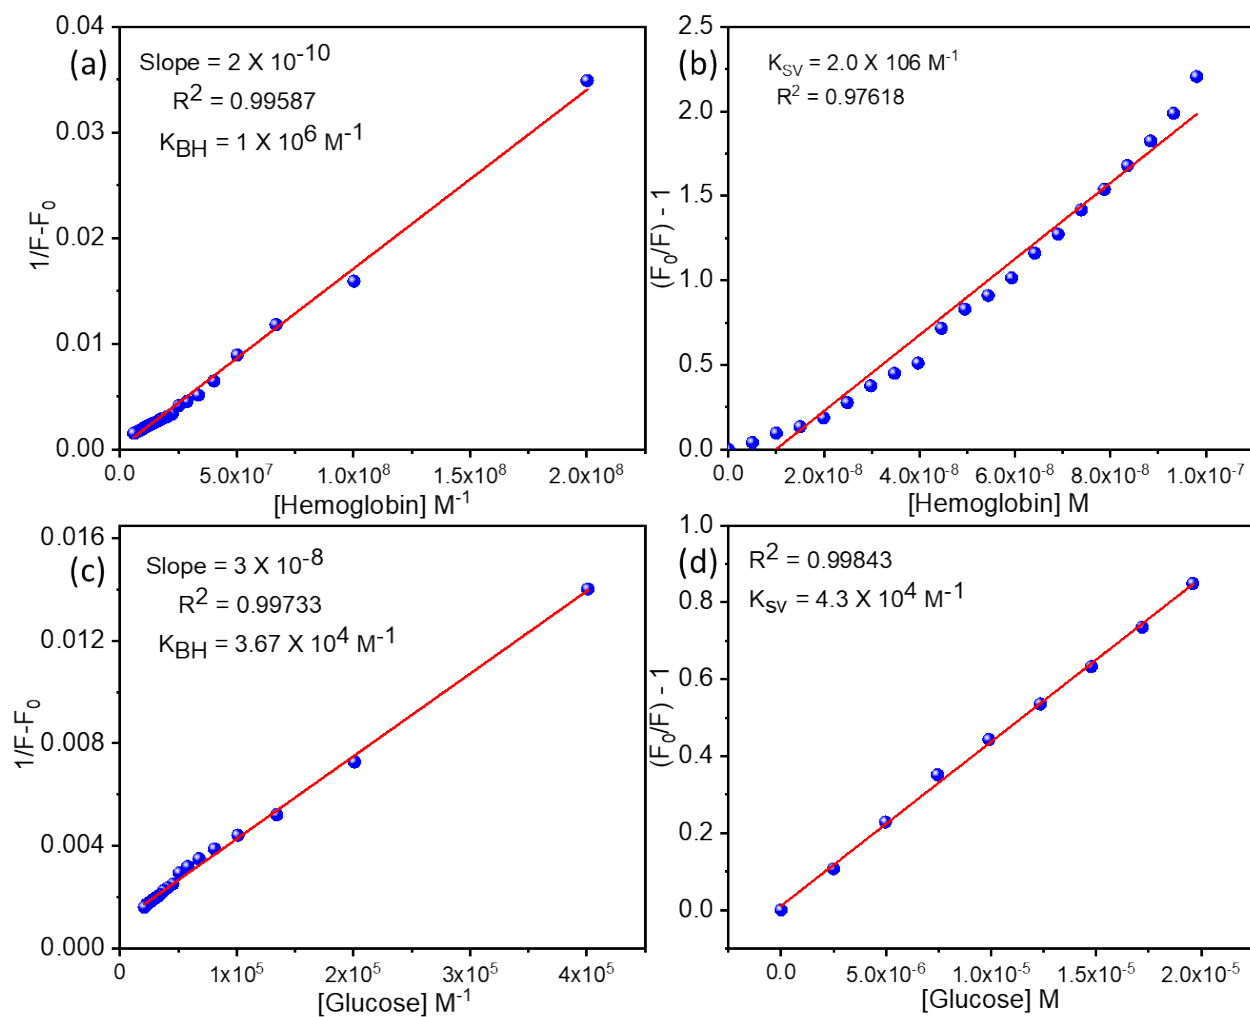

**Fig. S12.** The B-H plot of probe 2 with Hb (a) and glucose (c). The Stern-Volmer plot for the fluorescence quenching of probe 2 by Hb (b) and glucose (d).

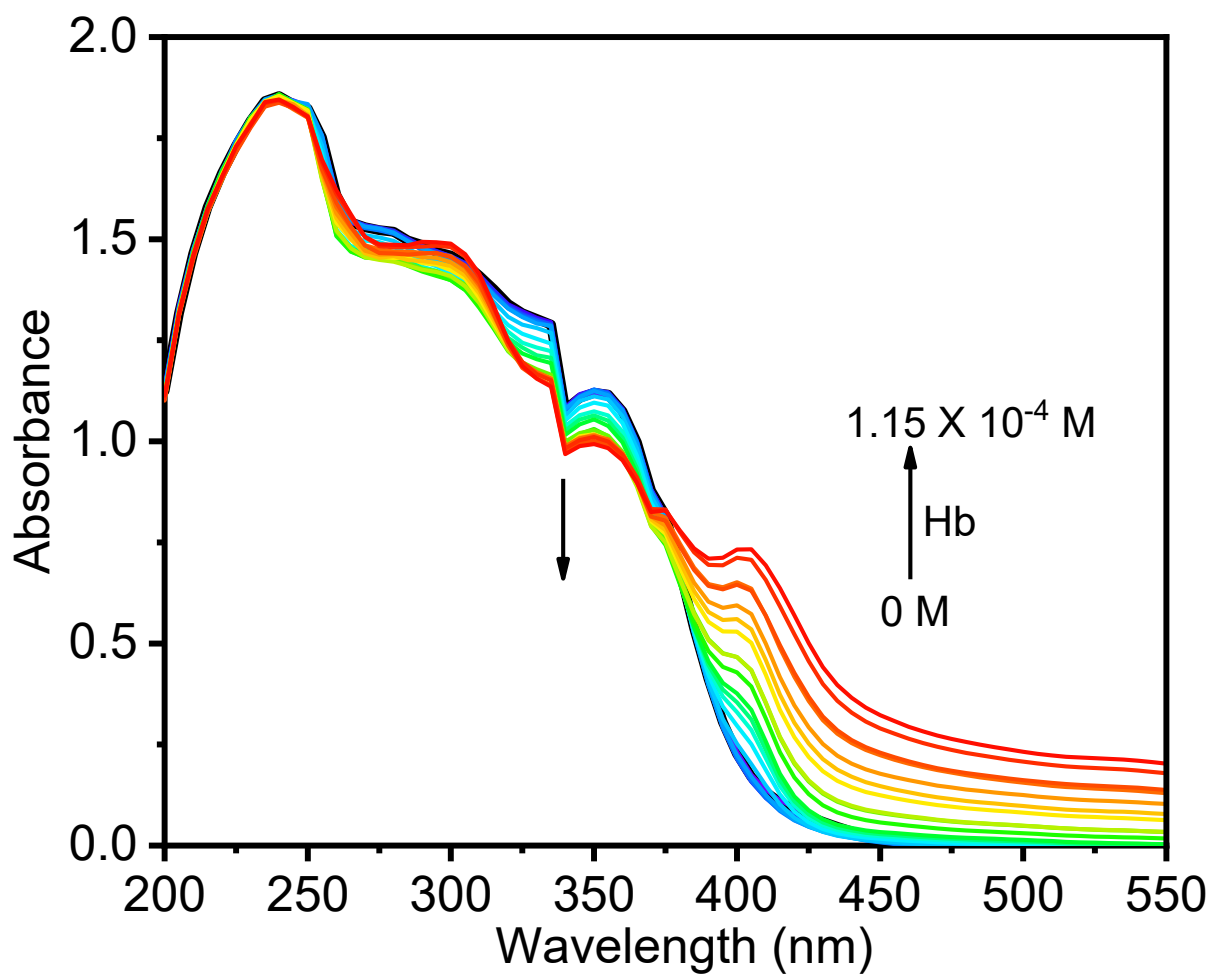

**Fig. S13.** UV-visible spectral changes of probe 2 with the gradual incremental addition of Hb.

**Table S1.** Fluorescence lifetime decay parameters of probe 1 and probe 1 with FA.

|             | $\tau^1$ (ns) | $\tau^2$ (ns) | $\tau^3$ (ns) | Average $\tau$ (ns) |
|-------------|---------------|---------------|---------------|---------------------|
| Probe 1     | 0.20 ns       | 0.50 ns       | 2.62 ns       | 1.10 ns             |
| Probe 1+ FA | 1.30 ns       | 0.40 ns       | 2.30 ns       | 1.33 ns             |

**Table S2.** Calculated atomic percentage of different elements of probe 2 in the presence of hemoglobin from the XPS scan.

| Name  | Start BE | Peak BE | End BE | Height CPS | FWHM eV | Area (P) CPS.eV | Area (N) TPP-2M | Atomic % |
|-------|----------|---------|--------|------------|---------|-----------------|-----------------|----------|
| S 2p  | 175      | 166.61  | 157    | 2034.56    | 7.157   | 18532.78        | 0.01            | 0.31     |
| C 1s  | 298      | 284.7   | 279.3  | 574852.32  | 3.559   | 2321461.02      | 3.69            | 76.69    |
| N 1s  | 410      | 399.22  | 392    | 18238.74   | 4.866   | 98829.92        | 0.1             | 2.07     |
| O 1s  | 539.34   | 531.87  | 525    | 334040.45  | 4.202   | 1478233.23      | 0.94            | 19.43    |
| Fe 2p | 740      | 712.02  | 700    | 4466.61    | 1.46    | 68909.89        | 0.01            | 0.21     |
| Zn2p  | 1052     | 1022.29 | 1015   | 88234.94   | 4.049   | 710086.12       | 0.06            | 1.3      |

**Table S3.** Fluorescence lifetime decay parameters of probe 2 and probe 2 with glucose.

|                  | $\tau^1$ (ns) | $\tau^2$ (ns) | $\tau^3$ (ns) | Average $\tau$ (ns) |
|------------------|---------------|---------------|---------------|---------------------|
| Probe 2          | 0.67 ns       | 1.34 ns       | 2.68 ns       | 1.56 ns             |
| Probe 2+ Glucose | 0.80 ns       | 1.61 ns       | 3.22 ns       | 1.87 ns             |

**Table S4.** Real sample analysis of folic acid using probe 1.

| Sample | Folic acid            |                       |             |        |
|--------|-----------------------|-----------------------|-------------|--------|
|        | Added, M              | Found, M              | Recovery, % | RSD, % |
| Serum  | $4.97 \times 10^{-6}$ | $4.50 \times 10^{-6}$ | 90.54 %     | 1.20   |
|        | $1.23 \times 10^{-5}$ | $1.15 \times 10^{-5}$ | 93.49 %     | 2.16   |
|        | $1.47 \times 10^{-5}$ | $1.42 \times 10^{-5}$ | 97.93 %     | 0.68   |

**Table S5.** Real sample analysis of hemoglobin using probe 2.

| Sample | Hemoglobin            |                       |             |        |
|--------|-----------------------|-----------------------|-------------|--------|
|        | Added, M              | Found, M              | Recovery, % | RSD, % |
| Serum  | $7.38 \times 10^{-8}$ | $7.34 \times 10^{-8}$ | 99.45%      | 0.13   |

|  |                       |                       |         |      |
|--|-----------------------|-----------------------|---------|------|
|  | $7.87 \times 10^{-8}$ | $7.52 \times 10^{-8}$ | 95.55 % | 0.42 |
|  | $8.35 \times 10^{-8}$ | $7.93 \times 10^{-8}$ | 94.97 % | 0.20 |

**Table S6.** Real sample analysis of glucose using probe 2.

| Sample | Glucose               |                       |             |        |
|--------|-----------------------|-----------------------|-------------|--------|
|        | Added, M              | Found, M              | Recovery, % | RSD, % |
| Serum  | $3.14 \times 10^{-5}$ | $3.05 \times 10^{-5}$ | 97.13 %     | 1.91   |
|        | $3.38 \times 10^{-5}$ | $3.15 \times 10^{-5}$ | 93.19 %     | 0.69   |
|        | $3.61 \times 10^{-5}$ | $3.33 \times 10^{-5}$ | 92.24 %     | 0.64   |

\*\*\*\*\*
